# Supplementary material for: Transcriptomic and proteomic retinal pigment epithelium signatures of age-related macular degeneration
Source: PubMed Central journal article supplement (PMC9325891; doi:10.1038/s41467-022-31707-4), 2022-07-26
Supplement: 41467_2022_31707_MOESM1_ESM.pdf [file 41467_2022_31707_MOESM1_ESM.pdf]

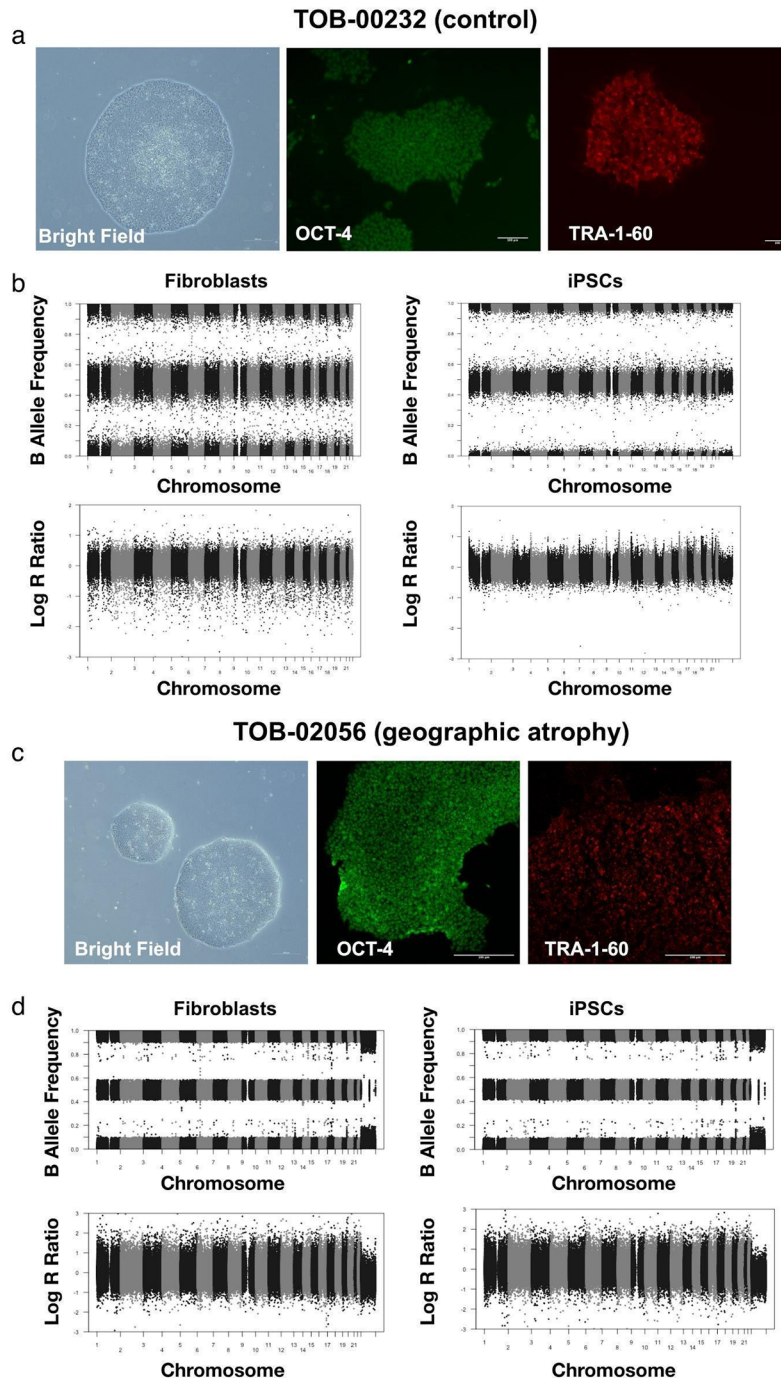

**Supplementary Figure 1. Examples of quality control for iPSC lines, Related to Figure 1.** Control line TOB-00232 (**a**, **b**) and geographic atrophy line TOB-02056 (**c**, **d**) are shown. (**a**, **c**) Representative bright field images and immunostainings for the pluripotent markers OCT-4 and TRA-1-60 for both lines (Scale bars: 200  $\mu\text{m}$  for bright field, and 100  $\mu\text{m}$  for immunofluorescence). Images are representative of all cell lines. (**b**, **d**) Copy Number Variation Analysis for both parental fibroblasts and iPSCs representative of a normal virtual karyotyping. Each panel shows the B allele frequency (BAF) and the log R ratio (LRR). BAF at values other than 0, 0.5 or 1 indicate an abnormal copy number. LRR represents a logged ratio of “observed probe intensity to expected intensity”. A deviation from zero corresponds to a change in copy number. Quality control was performed on all lines (images and copy number variation).

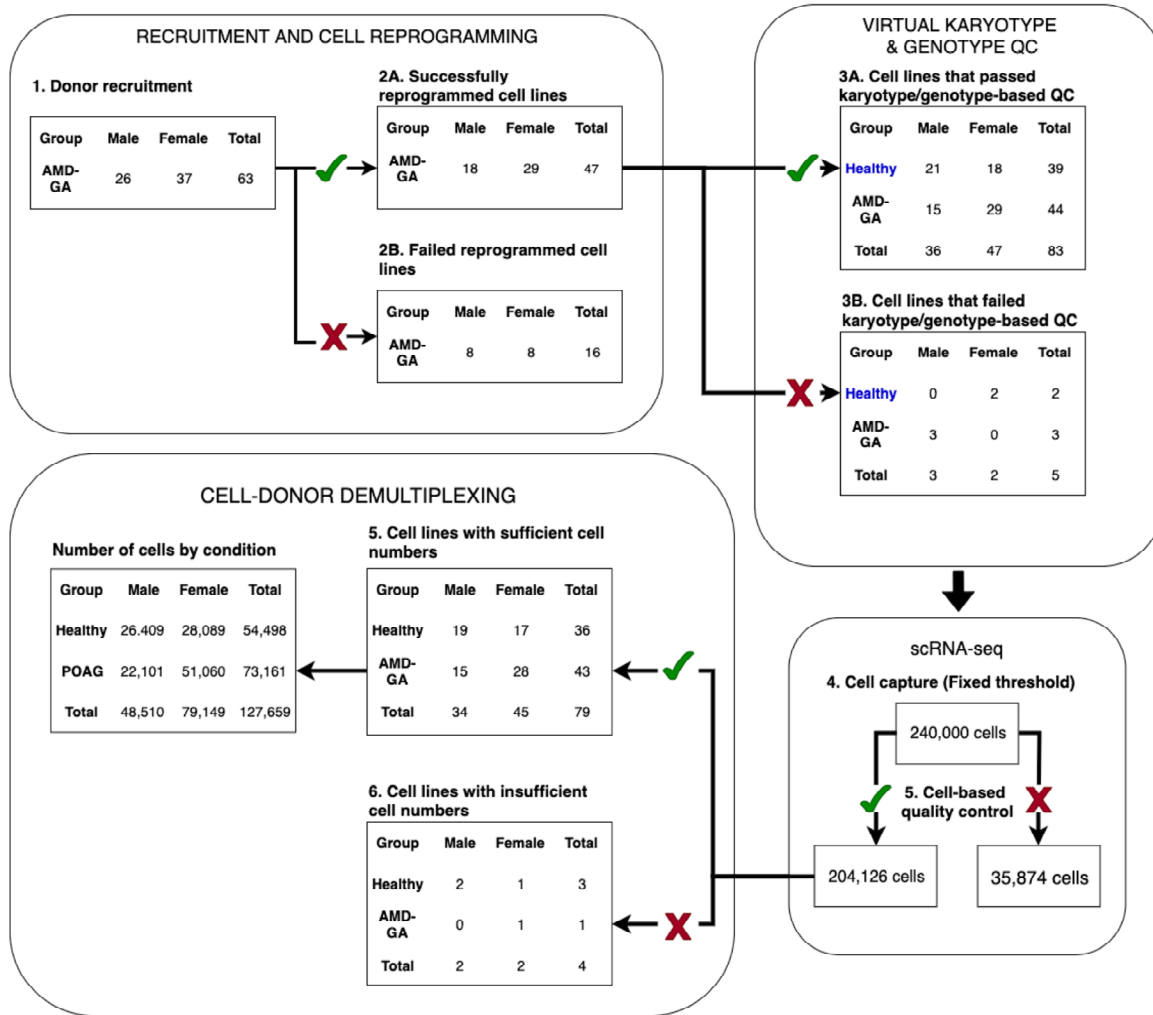

**Supplementary Figure 2. Cell line and capture quality control flowchart.** Cell lines were generated from skin biopsies of AMD-Geographic atrophy patients, and reprogrammed into iPSCs and subsequently, RPE. Healthy lines were generated in Daniszewski et al (Cell Genomics, 2022). Lines were discarded if they failed virtual karyotype and/or genotype QC, and if less than 200 cells were captured by scRNA-seq.

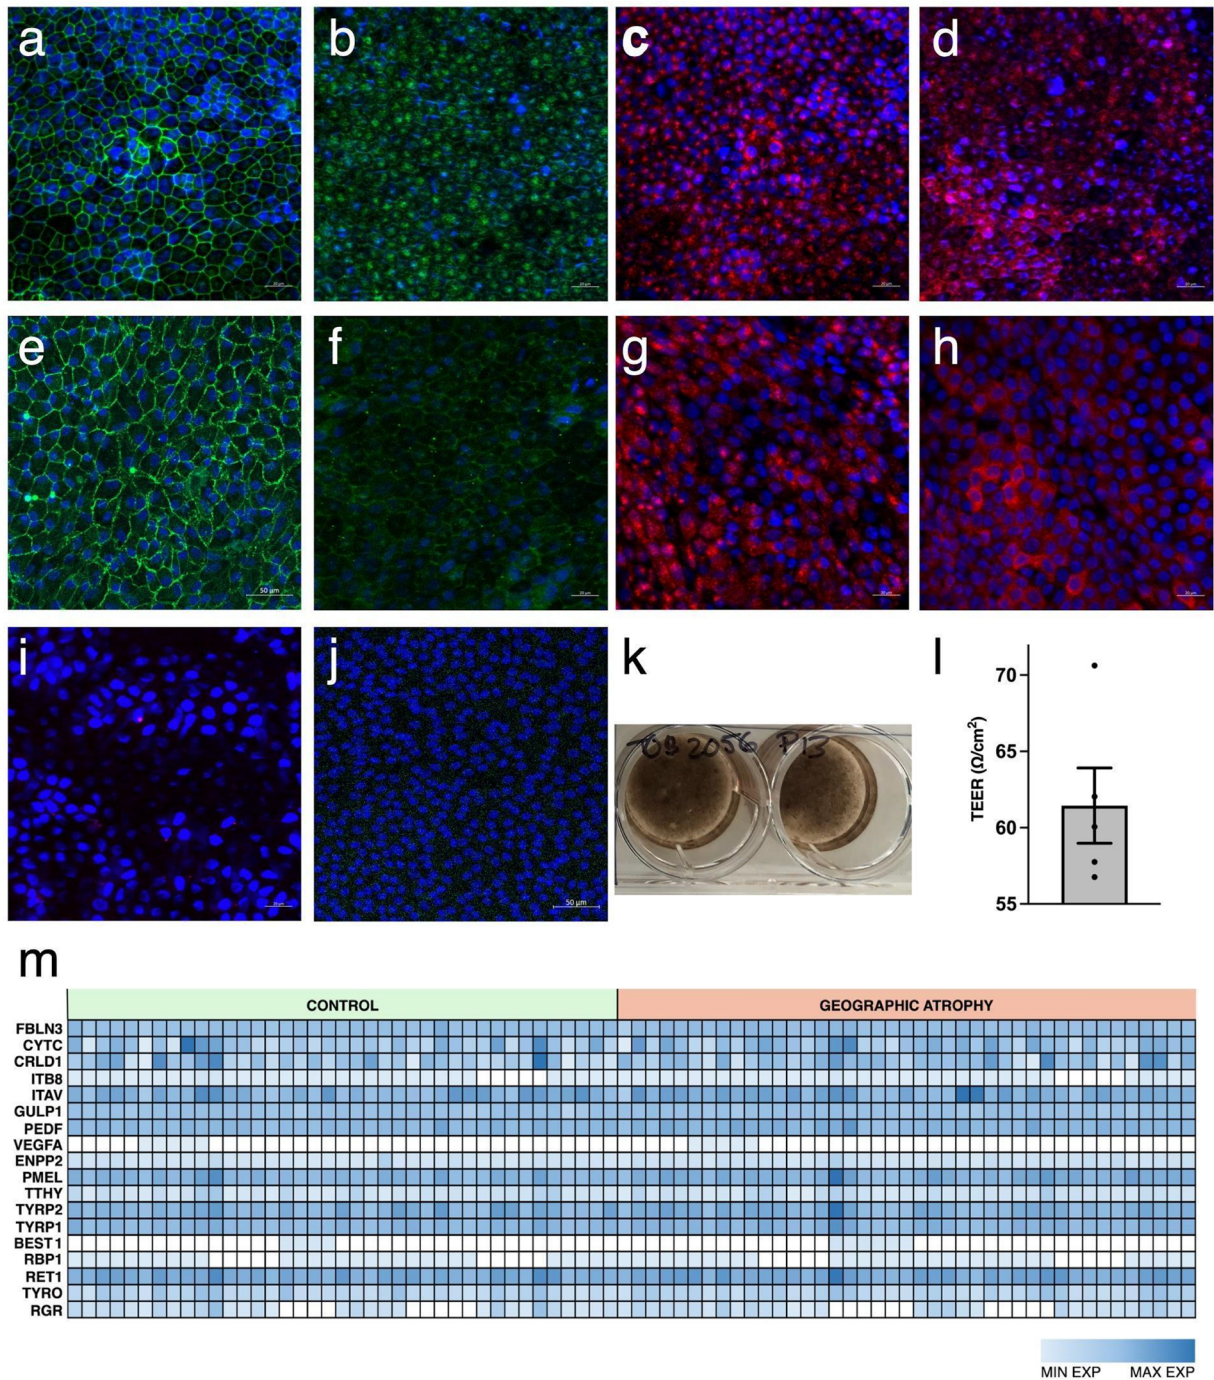

**Supplementary Figure 3. Characterisation of RPE cells.** (a-j) Representative images of control (a-d) or geographic atrophy (e-h) iPSC-derived RPE cells immunostained with RPE markers ZO-1 (a, e), PMEL (b, f), BESTROPHIN (c, g), RPE65 (d, h), or IgG isotype controls for rabbit (i) or mouse (j) and counterstained with DAPI (Scale bars: a-d, f-i: 20  $\mu\text{m}$ ; e: 50  $\mu\text{m}$ ; j: 100  $\mu\text{m}$ ). (k) Representative bright field image of iPSC-derived RPE cells showing cobblestone morphology and pigmentation. (l) Transepithelial electrical resistance readings expressed in  $\Omega$  per  $\text{cm}^2$ , showing consistency of readings across different cultures. Data are Mean  $\pm$  SEM of 5 independent wells of a same iPSC-derived RPE cell culture. (m) Examples of RPE canonical marker protein expression from the large-scale mass spectrometry proteomic analysis, with all cell lines for each cohort represented as a square. Data presented as a heat map of raw values, with intensity represented by colour gradient (minimal to maximal expression).



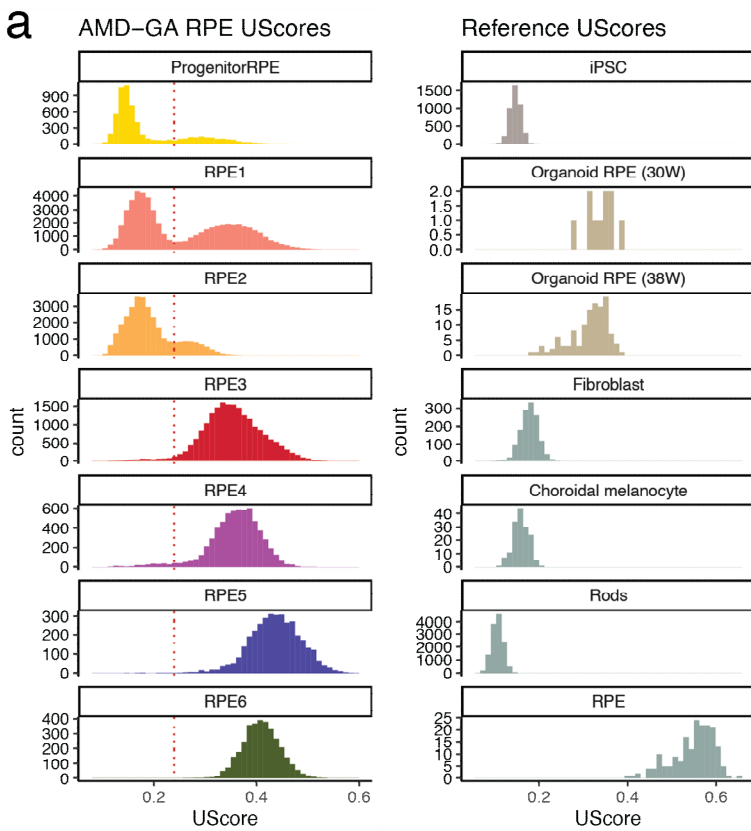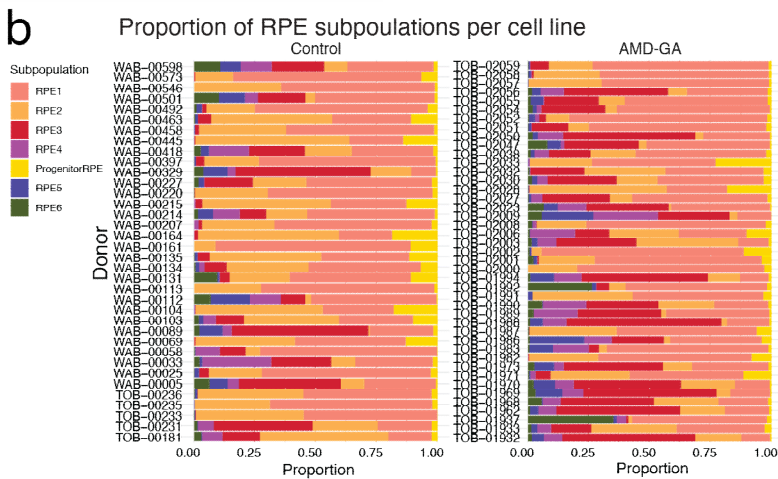

**Supplementary Figure 4. Characterisation of the sub populations (a) Distribution of mature RPE gene signature scores in RPE subpopulations and reference datasets.** A mature RPE gene signature score - UScore, was calculated for each cell in RPE subpopulation and reference datasets - iPSC (Daniszewski et al. 2018), Organoid - RPE 30W and Organoid - RPE 38W (Cowan et al. 2020), Fibroblasts, Choroidal Melanocytes, Rods and adult RPE (Cowan et al. 2020). Histograms depict distribution of UScore in each tested group. **(b) Proportion of RPE subpopulations per cell line.** Cells were matched to reference RPE subpopulations via cell type classification, and to donors via genotyping. Proportions of RPE subpopulations were calculated for each cell line.



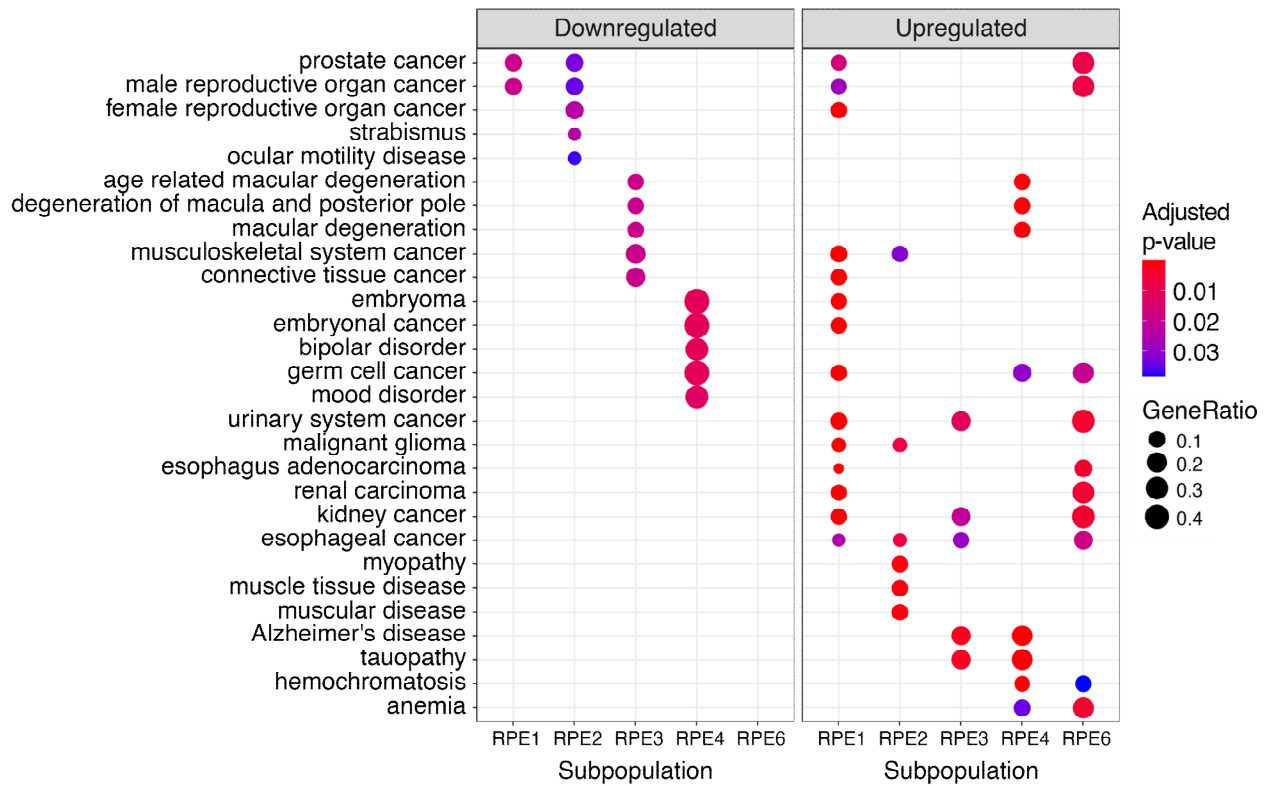

**Supplementary Figure 5. Disease ontology analysis.** Differentially expressed genes from geographic atrophy cells of each RPE subpopulation underwent over-representation analysis using gene sets from the Disease Ontology database. Upregulated and downregulated genes were analyzed separately. GeneRatio represents the proportion of genes in the query dataset that were also present in the DO gene set. The color scale represents the adjusted p-value of as calculated by the Benjamani & Hochberg method.

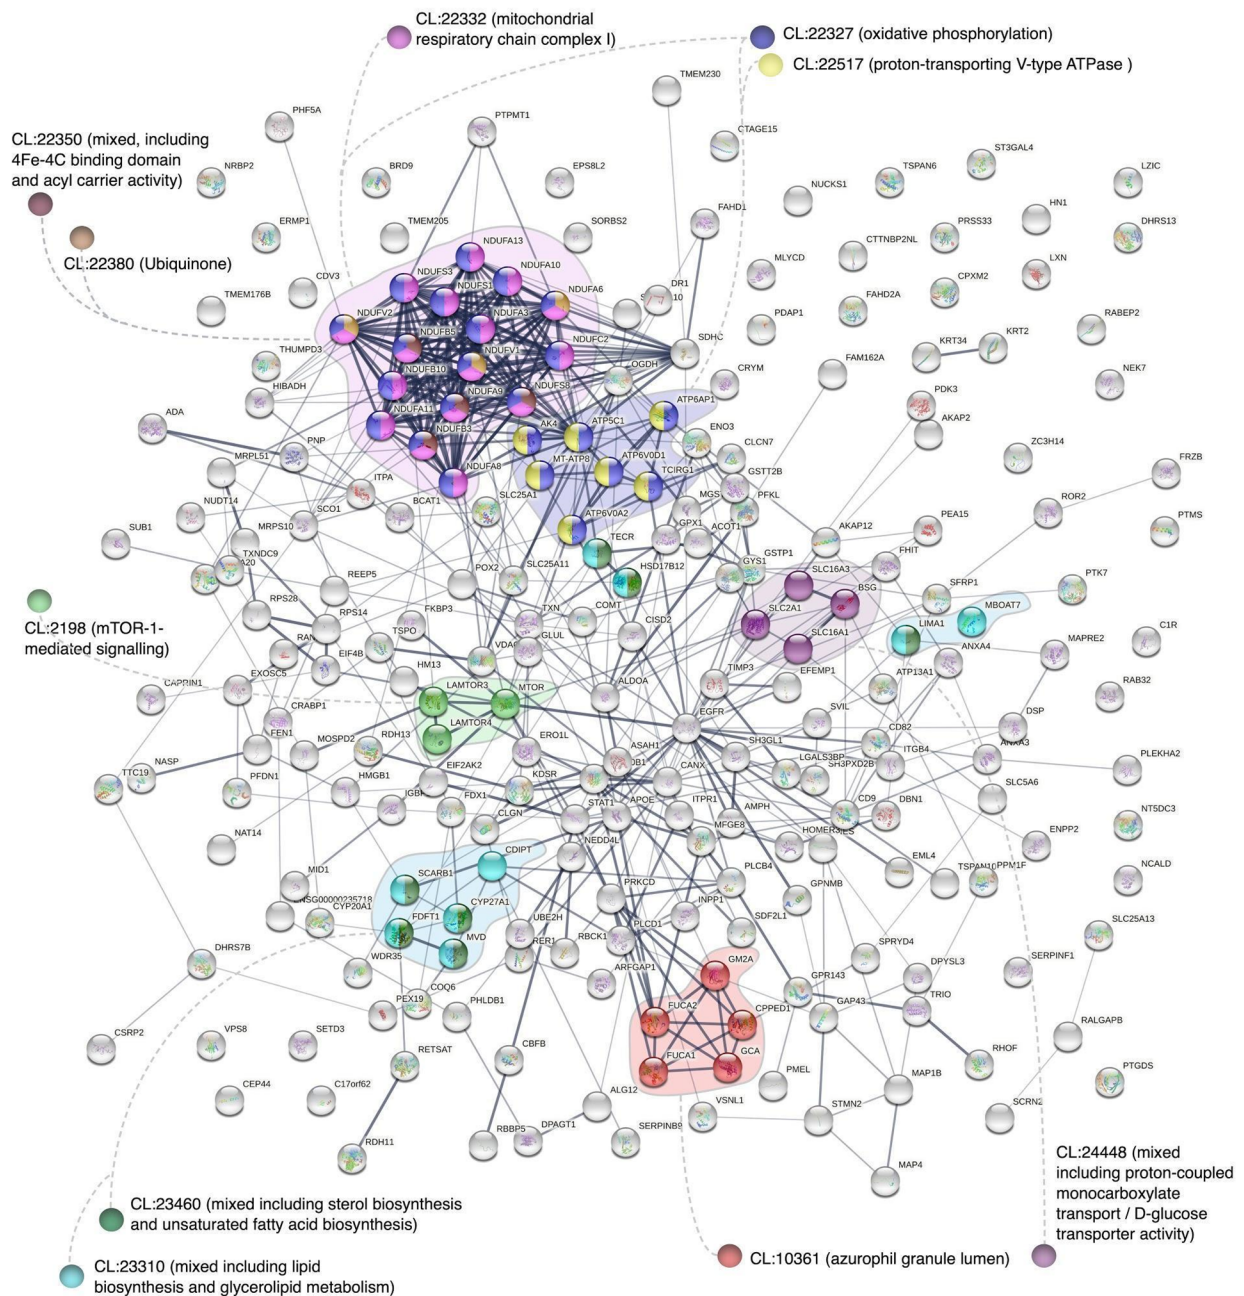

**Supplementary Figure 6. Proteome analysis of control and geographic atrophy-RPE cells.** Entire local network clustering (STRING) with enriched pathways highlighted in coloured nodules.

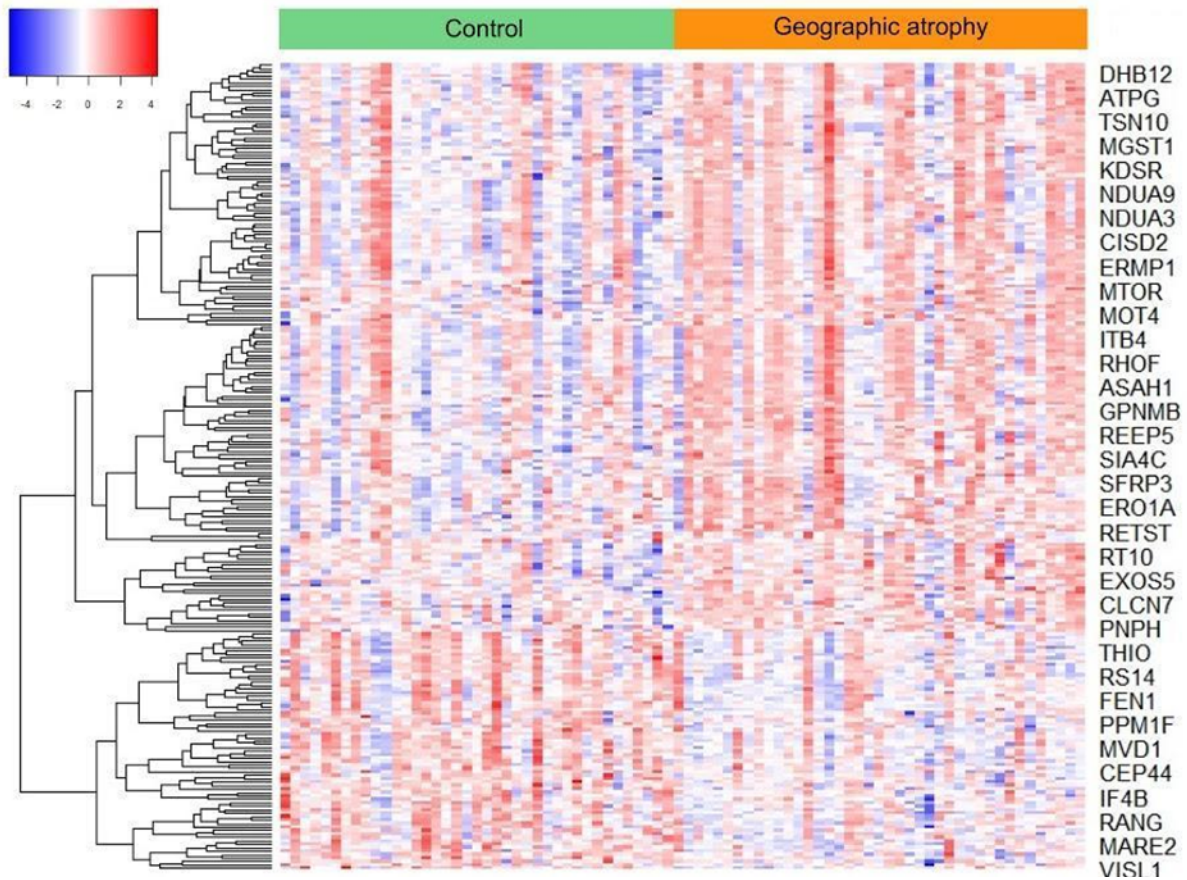

**Supplementary Figure 7. Proteome analysis of control and geographic atrophy-RPE cells.** Heatmap representation of protein expression in all iPSC-derived RPE cells from each cohort, with expression represented by color gradient.



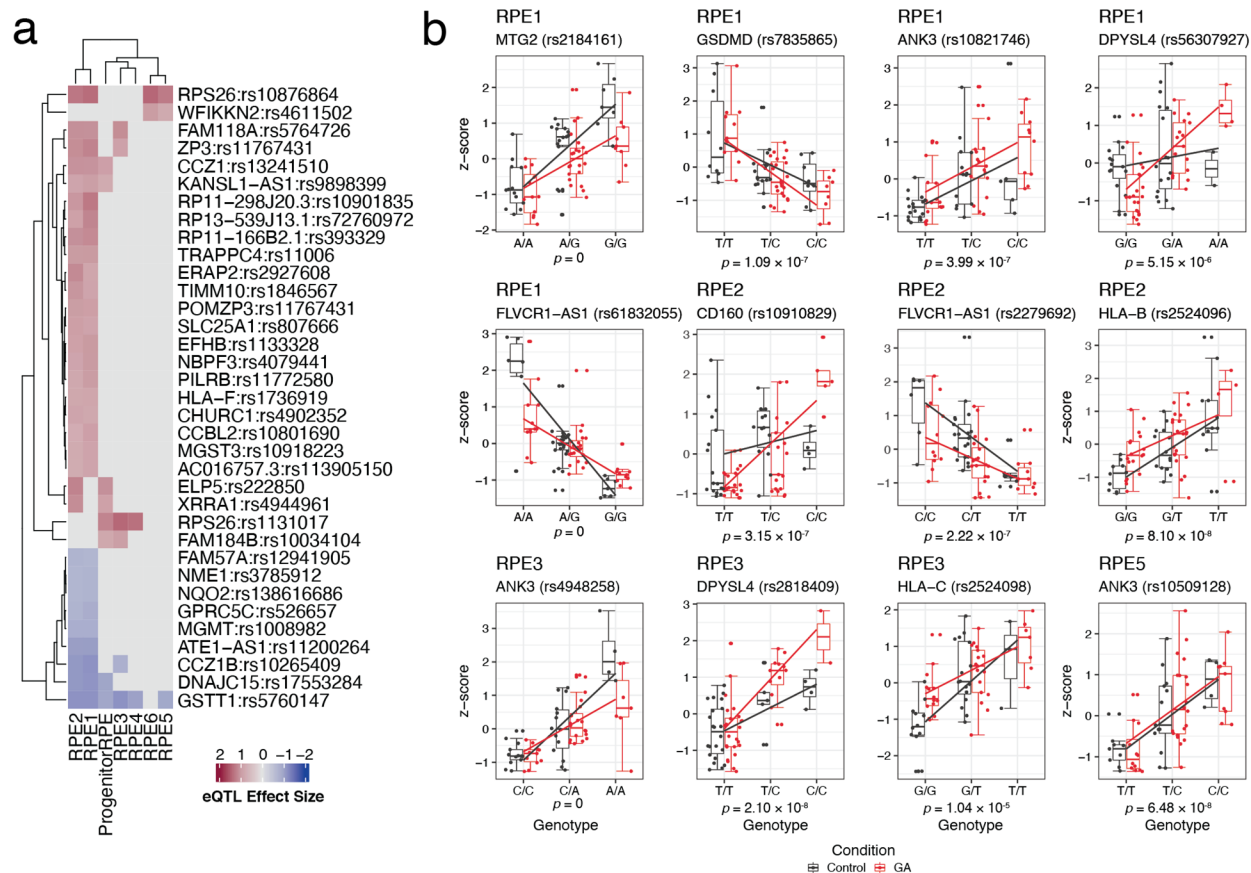

**Supplementary Figure 8. Lead cis-eQTL with known and potential associations with age macular degeneration and geographic atrophy.** (a) Effect sizes and direction of lead cis-eQTL replicated between RPE subpopulations. Effect size is a measure of magnitude of effect of genotype on expression. Red represents effect sizes greater than 0, while blue represents effect sizes below 0. (b) To visualize the relationship between genotype and expression, we grouped donors into genotype and condition (Black: Control, Red: Geographic Atrophy) and plotted the aggregated, z-transformed counts of donors as box plots. The slope of the regression line represents changes to the expression trend based on the addition of the alternative allele. All boxplots show p-values for cis-eQTL analysis, medians (horizontal line within box), first (25<sup>th</sup> percentile) and third (75<sup>th</sup> percentile) quartiles (lower and upper hinges), 1.5 × the interquartile range (whiskers) and z-scores of individual samples as points.  $n_{RPE1}$ : (Control: 35 individuals, GA: 43 individuals),  $n_{RPE2}$  = (Control: 35 individuals, GA: 43 individuals),  $n_{RPE3}$  = (Control: 31 individuals, GA: 38 individuals),  $n_{RPE5}$  = (Control: 26 individuals, GA: 41 individuals).

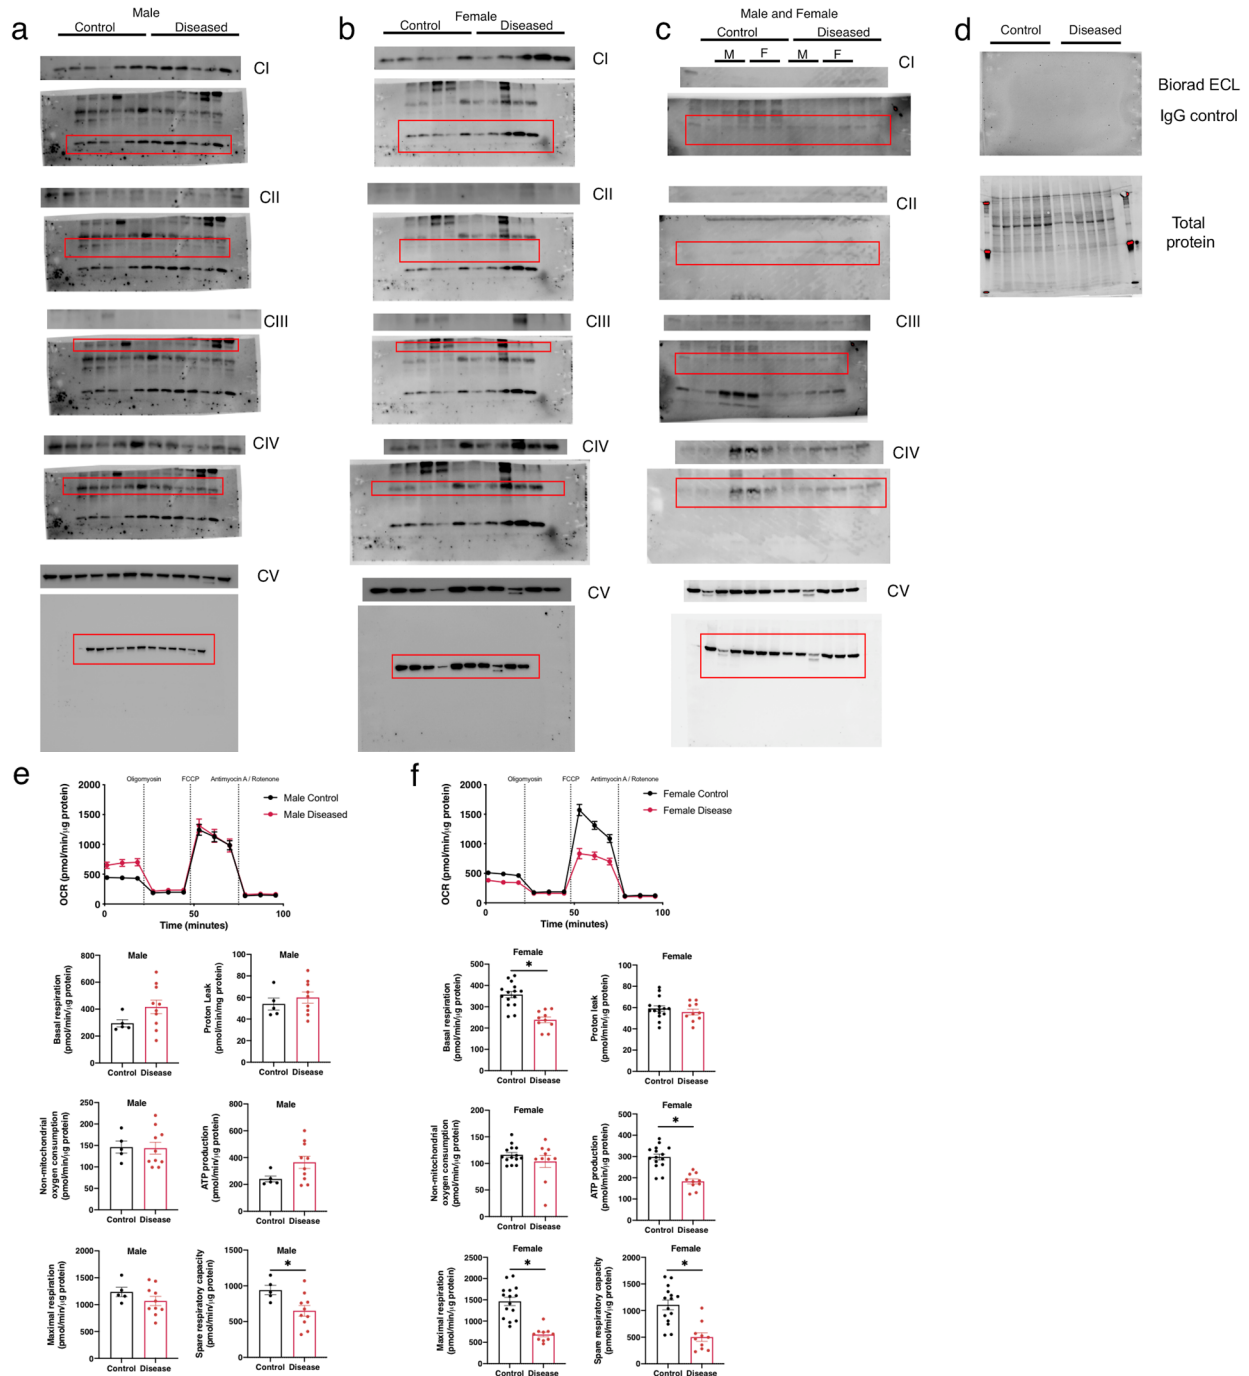

**Supplementary Figure 9. Functional assessment of the mitochondria. (a-c)** Uncropped western blots used for quantifications of Figure 6a, separated into sex (a: male, b: female, corresponding to Figure 6a c: male and female). **(d)** Isotype controls corresponding to the antibodies used for the western blots. **(e-f)** Oxygen consumption rate separated by sex and corresponding to Figure 5b. Quantification of basal respiration, non-mitochondrial oxygen consumption, proton leak, ATP production, maximal respiration and spare respiratory capacity was calculated from 8 biological samples (Control: 1 male, 3 female; geographic atrophy: 2 male, 2 female), containing 5 technical replicates each. Data presented are mean  $\pm$  SEM, with statistical significance established as  $*p < 0.05$  using two-tailed unpaired *t*-tests. **e:** bottom right panel, male spare respiratory capacity  $p =$

0.0267; **f**: top left panel - female basal respiration  $p = 0.0000349$ ; bottom left panel - female max respiration  $p = 0.00000000965$ ; bottom right panel - female spare respiratory capacity  $p = 0.00000145$ ; middle right panel - female ATP production  $p = 0.000000667$ . Source data are provided as a Source Data file.



**Supplementary Table 1. Single cell RNA-sequencing quality metrics**

| Pool                                                  | 1           | 2           | 3           | 4           | 5           | 6           | 7           | 8           | 9           | 10          | 11          | 12          |
|-------------------------------------------------------|-------------|-------------|-------------|-------------|-------------|-------------|-------------|-------------|-------------|-------------|-------------|-------------|
| <b>Forced Number of Cells</b>                         | 20,000      | 20,000      | 20,000      | 20,000      | 20,000      | 20,000      | 20,000      | 20,000      | 20,000      | 20,000      | 20,000      | 20,000      |
| <b>Mean Reads per Cell</b>                            | 22,427      | 22,144      | 21,305      | 22,104      | 22,387      | 47,134      | 45,139      | 45,698      | 45,068      | 44,226      | 45,159      | 46,388      |
| <b>Median Genes per Cell</b>                          | 2,516       | 2,426       | 2,519       | 2556        | 2,460       | 3,283       | 3,049       | 3,162       | 3,210       | 3,052       | 2,034       | 3,084       |
| <b>Number of Reads</b>                                | 448,558,250 | 442,888,016 | 426,111,365 | 442,084,959 | 447,748,740 | 942,691,103 | 902,785,800 | 913,970,169 | 901,377,134 | 884,523,529 | 903,190,965 | 927,769,625 |
| <b>Valid Barcodes</b>                                 | 97.70%      | 97.80%      | 97.70%      | 97.70%      | 97.60%      | 97.50%      | 97.40%      | 97.40%      | 97.50%      | 97.70%      | 97.70%      | 97.40%      |
| <b>Sequencing Saturation</b>                          | 29.50%      | 30.00%      | 26.60%      | 25.60%      | 30.10%      | 48.60%      | 45.60%      | 43.10%      | 42.40%      | 50.10%      | 62.10%      | 59.10%      |
| <b>Q30 Bases in Barcode</b>                           | 96.30%      | 96.30%      | 96.30%      | 96.30%      | 96.40%      | 95.80%      | 95.80%      | 95.80%      | 95.80%      | 95.80%      | 95.80%      | 95.80%      |
| <b>Q30 Bases in RNA Read</b>                          | 94.80%      | 94.70%      | 95.00%      | 94.90%      | 95.00%      | 94.40%      | 94.10%      | 94.40%      | 94.20%      | 94.00%      | 94.20%      | 94.40%      |
| <b>Q30 Bases in Sample Index</b>                      | 93.50%      | 88.40%      | 94.60%      | 95.30%      | 90.30%      | 94.20%      | 93.40%      | 89.80%      | 89.20%      | 94.20%      | 92.10%      | 94.80%      |
| <b>Q30 Bases in UMI</b>                               | 96.20%      | 96.20%      | 96.10%      | 96.10%      | 96.20%      | 95.60%      | 95.50%      | 95.60%      | 95.60%      | 95.60%      | 95.50%      | 95.50%      |
| <b>Reads Mapped to Genome</b>                         | 96.60%      | 97.00%      | 97.00%      | 96.80%      | 97.10%      | 97.30%      | 96.90%      | 96.90%      | 97.00%      | 97.20%      | 97.30%      | 97.60%      |
| <b>Reads Mapped Confidently to Genome</b>             | 93.80%      | 94.30%      | 93.50%      | 93.40%      | 94.50%      | 94.80%      | 94.30%      | 94.30%      | 94.60%      | 95.00%      | 94.80%      | 95.20%      |
| <b>Reads Mapped Confidently to Intergenic Regions</b> | 6.00%       | 6.20%       | 5.90%       | 6.20%       | 4.90%       | 5.20%       | 4.90%       | 4.70%       | 4.50%       | 3.80%       | 4.10%       | 4.50%       |
| <b>Reads Mapped Confidently to Intronic Regions</b>   | 28.00%      | 27.90%      | 28.60%      | 30.00%      | 26.30%      | 25.30%      | 25.60%      | 22.90%      | 23.60%      | 22.60%      | 18.80%      | 26.20%      |
| <b>Reads Mapped Confidently to Exonic Regions</b>     | 59.80%      | 60.20%      | 59.00%      | 57.20%      | 63.20%      | 64.30%      | 63.70%      | 66.70%      | 66.40%      | 68.60%      | 71.90%      | 64.40%      |
| <b>Reads Mapped Confidently to Transcriptome</b>      | 56.20%      | 56.50%      | 55.20%      | 53.40%      | 59.70%      | 60.60%      | 59.80%      | 62.90%      | 62.80%      | 65.60%      | 68.60%      | 61.30%      |
| <b>Reads Mapped Antisense to Gene</b>                 | 1.50%       | 1.60%       | 1.80%       | 1.70%       | 1.50%       | 1.50%       | 1.80%       | 1.60%       | 1.50%       | 0.90%       | 1.10%       | 1.10%       |
| <b>Fraction Reads in Cells</b>                        | 86.40%      | 85.70%      | 82.50%      | 83.90%      | 88.40%      | 94.10%      | 90.90%      | 91.80%      | 91.90%      | 91.90%      | 93.20%      | 87.70%      |

| Pool                                           | 1               | 2               | 3               | 4               | 5               | 6               | 7               | 8               | 9               | 10              | 11              | 12              |
|------------------------------------------------|-----------------|-----------------|-----------------|-----------------|-----------------|-----------------|-----------------|-----------------|-----------------|-----------------|-----------------|-----------------|
| Forced Number of Cells                         | 20,000          | 20,000          | 20,000          | 20,000          | 20,000          | 20,000          | 20,000          | 20,000          | 20,000          | 20,000          | 20,000          | 20,000          |
| Mean Reads per Cell                            | 22,427          | 22,144          | 21,305          | 22,104          | 22,387          | 47,134          | 45,139          | 45,698          | 45,068          | 44,226          | 45,159          | 46,388          |
| Median Genes per Cell                          | 2,516           | 2,426           | 2,519           | 2556            | 2,460           | 3,283           | 3,049           | 3,162           | 3,210           | 3,052           | 2,034           | 3,084           |
| Number of Reads                                | 448,558,<br>250 | 442,888,<br>016 | 426,111,<br>365 | 442,084,<br>959 | 447,748,<br>740 | 942,691,<br>103 | 902,785,<br>800 | 913,970,<br>169 | 901,377,<br>134 | 884,523,<br>529 | 903,190,<br>965 | 927,769,<br>625 |
| Valid Barcodes                                 | 97.70%          | 97.80%          | 97.70%          | 97.70%          | 97.60%          | 97.50%          | 97.40%          | 97.40%          | 97.50%          | 97.70%          | 97.70%          | 97.40%          |
| Sequencing Saturation                          | 29.50%          | 30.00%          | 26.60%          | 25.60%          | 30.10%          | 48.60%          | 45.60%          | 43.10%          | 42.40%          | 50.10%          | 62.10%          | 59.10%          |
| Q30 Bases in Barcode                           | 96.30%          | 96.30%          | 96.30%          | 96.30%          | 96.40%          | 95.80%          | 95.80%          | 95.80%          | 95.80%          | 95.80%          | 95.80%          | 95.80%          |
| Q30 Bases in RNA Read                          | 94.80%          | 94.70%          | 95.00%          | 94.90%          | 95.00%          | 94.40%          | 94.10%          | 94.40%          | 94.20%          | 94.00%          | 94.20%          | 94.40%          |
| Q30 Bases in Sample Index                      | 93.50%          | 88.40%          | 94.60%          | 95.30%          | 90.30%          | 94.20%          | 93.40%          | 89.80%          | 89.20%          | 94.20%          | 92.10%          | 94.80%          |
| Q30 Bases in UMI                               | 96.20%          | 96.20%          | 96.10%          | 96.10%          | 96.20%          | 95.60%          | 95.50%          | 95.60%          | 95.60%          | 95.60%          | 95.50%          | 95.50%          |
| Reads Mapped to Genome                         | 96.60%          | 97.00%          | 97.00%          | 96.80%          | 97.10%          | 97.30%          | 96.90%          | 96.90%          | 97.00%          | 97.20%          | 97.30%          | 97.60%          |
| Reads Mapped Confidently to Genome             | 93.80%          | 94.30%          | 93.50%          | 93.40%          | 94.50%          | 94.80%          | 94.30%          | 94.30%          | 94.60%          | 95.00%          | 94.80%          | 95.20%          |
| Reads Mapped Confidently to Intergenic Regions | 6.00%           | 6.20%           | 5.90%           | 6.20%           | 4.90%           | 5.20%           | 4.90%           | 4.70%           | 4.50%           | 3.80%           | 4.10%           | 4.50%           |
| Reads Mapped Confidently to Intronic Regions   | 28.00%          | 27.90%          | 28.60%          | 30.00%          | 26.30%          | 25.30%          | 25.60%          | 22.90%          | 23.60%          | 22.60%          | 18.80%          | 26.20%          |
| Reads Mapped Confidently to Exonic Regions     | 59.80%          | 60.20%          | 59.00%          | 57.20%          | 63.20%          | 64.30%          | 63.70%          | 66.70%          | 66.40%          | 68.60%          | 71.90%          | 64.40%          |
| Reads Mapped Confidently to Transcriptome      | 56.20%          | 56.50%          | 55.20%          | 53.40%          | 59.70%          | 60.60%          | 59.80%          | 62.90%          | 62.80%          | 65.60%          | 68.60%          | 61.30%          |
| Reads Mapped Antisense to Gene                 | 1.50%           | 1.60%           | 1.80%           | 1.70%           | 1.50%           | 1.50%           | 1.80%           | 1.60%           | 1.50%           | 0.90%           | 1.10%           | 1.10%           |
| Total Genes Detected                           | 25,924          | 25,469          | 25,746          | 26,366          | 25,710          | 26,445          | 26,434          | 26,274          | 26,389          | 24,967          | 24,826          | 24,950          |
| Median UMI Counts per Cell                     | 6,970           | 6,923           | 6,528           | 6,507           | 6,980           | 11,706          | 10,698          | 11,874          | 11,059          | 8,699           | 5,449           | 8,819           |

**Supplementary Table 2. Deconvolution of shared single cell pools and doublet detection.**

| <b>Pool</b> | <b>Pooled<br/>Individuals</b> | <b>Detected<br/>Individuals</b> | <b>Scrublet minimum gene<br/>variability percentage</b> | <b>Singlets</b> | <b>Doublets</b> |
|-------------|-------------------------------|---------------------------------|---------------------------------------------------------|-----------------|-----------------|
| 1           | 8                             | 8                               | 80                                                      | 12,891          | 1,472           |
| 2           | 8                             | 6                               | 80                                                      | 9,896           | 2,008           |
| 3           | 8                             | 8                               | 80                                                      | 11,825          | 2,398           |
| 4           | 8                             | 8                               | 80                                                      | 12,559          | 1,876           |
| 5           | 8                             | 8                               | 80                                                      | 12,588          | 1,855           |
| 6           | 8                             | 8                               | 80                                                      | 11,924          | 1,699           |
| 7           | 7                             | 7                               | 80                                                      | 12,419          | 2,270           |
| 8           | 6                             | 6                               | 80                                                      | 4,967           | 2,498           |
| 9           | 7                             | 7                               | 80                                                      | 12,013          | 1,862           |
| 10          | 7                             | 8                               | 80                                                      | 12,843          | 2,849           |
| 11          | 7                             | 6                               | 80                                                      | 6,495           | 1,410           |
| 12          | 6                             | 6                               | 80                                                      | 9,539           | 4,602           |
|             | 88                            | 86                              | 90                                                      | 129,959         | 26,799          |



**Supplementary Table 3. Summary of cell type and donor assignments.**

| Reference | GA     | Control | Total   | Subpopulation |
|-----------|--------|---------|---------|---------------|
| Common_4  | 32,254 | 24,027  | 56,281  | RPE1          |
| Common_6  | 14,620 | 16,780  | 31,400  | RPE2          |
| Common_3  | 14,501 | 5,851   | 20,352  | RPE3          |
| Common_1  | 4,329  | 2,113   | 6,442   | RPE4          |
| Control_3 | 2,977  | 3,159   | 6,136   | ProgenitorRPE |
| Common_2  | 2,269  | 1,396   | 3,665   | RPE5          |
| Control_0 | 2,211  | 1,172   | 3,383   | RPE6          |
| Control_4 | 186    | 98      | 284     | RPE7          |
| Control_2 | 221    | 41      | 262     | RPE8          |
| Aged_5    | 87     | 36      | 123     | RPE9          |
| Control_5 | 34     | 34      | 68      | RPE10         |
| Aged_1    | 33     | 21      | 54      | RPE11         |
| Control_1 | 8      | 12      | 20      | RPE12         |
| Aged_0    | 3      | 0       | 3       | RPE13         |
| Common_5  | 1      | 2       | 3       | RPE14         |
| Aged_2    | 1      | 0       | 1       | RPE15         |
| Aged_3    | 0      | 1       | 1       | RPE16         |
|           | 73,735 | 54,743  | 128,478 |               |

GA: geographic atrophy.

**Supplementary Table 4. Post-hoc comparisons of cell subpopulation proportions between conditions**

| Subpopulation | Residuals (GA) | Adjusted P-values (GA) | Residuals (Control) | Adjusted P-values (Control) |
|---------------|----------------|------------------------|---------------------|-----------------------------|
| ProgenitorRPE | -1.43E+01      | 0.00E+00               | 1.43E+01            | 0.00E+00                    |
| RPE1          | -5.43E-03      | 1.00E+00               | 5.43E-03            | 1.00E+00                    |
| RPE2          | -4.43E+01      | 0.00E+00               | 4.43E+01            | 0.00E+00                    |
| RPE3          | 4.39E+01       | 0.00E+00               | -4.39E+01           | 0.00E+00                    |
| RPE4          | 1.65E+01       | 0.00E+00               | -1.65E+01           | 0.00E+00                    |
| RPE5          | 5.71E+00       | 1.60E-07               | -5.71E+00           | 1.60E-07                    |
| RPE6          | 9.59E+00       | 0.00E+00               | -9.59E+00           | 0.00E+00                    |

GA: geographic atrophy.

**Supplementary Table 5. Statistical significance of differences between average cell subpopulation proportions**

| <b>Subpopulation</b> | <b>Baseline Prop - Frequency</b> | <b>Prop Mean - GA</b> | <b>Prop Mean - Control</b> | <b>PropRatio</b> | <b>Tstatistic</b> | <b>P.Value</b> | <b>FDR</b> |
|----------------------|----------------------------------|-----------------------|----------------------------|------------------|-------------------|----------------|------------|
| ProgenitorRPE        | 0.048                            | 0.036                 | 0.053                      | 0.681            | -1.510            | 0.135          | 0.207      |
| RPE1                 | 0.441                            | 0.452                 | 0.472                      | 0.957            | -0.481            | 0.632          | 0.632      |
| RPE2                 | 0.246                            | 0.176                 | 0.284                      | 0.619            | -3.095            | 0.003          | 0.019      |
| RPE3                 | 0.159                            | 0.215                 | 0.112                      | 1.928            | 2.427             | 0.017          | 0.061      |
| RPE4                 | 0.050                            | 0.057                 | 0.037                      | 1.536            | 2.024             | 0.046          | 0.108      |
| RPE5                 | 0.029                            | 0.035                 | 0.025                      | 1.430            | 1.462             | 0.148          | 0.207      |
| RPE6                 | 0.027                            | 0.029                 | 0.018                      | 1.589            | 1.234             | 0.221          | 0.258      |

GA: geographic atrophy.

**Supplementary Table 6. Replication of single cell-level DE genes in studies of bulk RPE transcriptomes**

| <b>DE gene set</b> | <b>Bulk DE gene set</b>                     | <b>Number of common DE genes</b> | <b>% Same effect direction</b> | <b>% Different effect direction</b> |
|--------------------|---------------------------------------------|----------------------------------|--------------------------------|-------------------------------------|
| AMD vs Control     | Dhirachaikulpanich et al. 2020 - Macula     | 202                              | 48                             | 52                                  |
|                    | Dhirachaikulpanich et al. 2020 - Non-macula | 129                              | 53.5                           | 46.5                                |
|                    | Kim et al. 2018 - PRCS                      | 1276                             | 71.7                           | 28.3                                |
| Progenitor RPE     | Dhirachaikulpanich et al. 2020 - Macula     | 4                                | 50                             | 50                                  |
|                    | Dhirachaikulpanich et al. 2020 - Non-macula | 4                                | 25                             | 75.00                               |
|                    | Kim et al. 2018 - PRCS                      | 98                               | 25.5                           | 74.5                                |
| RPE1               | Dhirachaikulpanich et al. 2020 - Macula     | 136                              | 54.5                           | 45.6                                |
|                    | Dhirachaikulpanich et al. 2020 - Non-macula | 78                               | 50                             | 50                                  |
|                    | Kim et al. 2018 - PRCS                      | 887                              | 73.1                           | 26.9                                |
| RPE2               | Dhirachaikulpanich et al. 2020 - Macula     | 106                              | 56.6                           | 43.4                                |
|                    | Dhirachaikulpanich et al. 2020 - Non-macula | 50                               | 50                             | 50                                  |
|                    | Kim et al. 2018 - PRCS                      | 583                              | 75.3                           | 24.7                                |
| RPE3               | Dhirachaikulpanich et al. 2020 - Macula     | 23                               | 56.5                           | 43.5                                |
|                    | Dhirachaikulpanich et al. 2020 - Non-macula | 7                                | 71.4                           | 28.6                                |
|                    | Kim et al. 2018 - PRCS                      | 105                              | 68.6                           | 31.4                                |
| RPE4               | Dhirachaikulpanich et al. 2020 - Macula     | 15                               | 80                             | 20                                  |
|                    | Dhirachaikulpanich et al. 2020 - Non-macula | 1                                | 100                            | 0                                   |
|                    | Kim et al. 2018 - PRCS                      | 70                               | 85.7                           | 14.3                                |

|      |                                             |    |      |      |
|------|---------------------------------------------|----|------|------|
| RPE5 | Dhirachaikulpanich et al. 2020 - Macula     | 10 | 70   | 30   |
|      | Dhirachaikulpanich et al. 2020 - Non-macula | 4  | 75   | 25   |
|      | Kim et al. 2018 - PRCS                      | 36 | 27.8 | 72.2 |
| RPE6 | Dhirachaikulpanich et al. 2020 - Macula     | 6  | 16.7 | 83.3 |
|      | Dhirachaikulpanich et al. 2020 - Non-macula | 2  | 0    | 100  |
|      | Kim et al. 2018 - PRCS                      | 44 | 47.7 | 52.3 |

**Supplementary Table 7. Percentage replication of lead cis-eQTL between RPE subpopulations.**

| Subpopulation | ProgenitorRPE | RPE1 | RPE2 | RPE3 | RPE4 | RPE5 | RPE6 |
|---------------|---------------|------|------|------|------|------|------|
| ProgenitorRPE | 100           | 1.7  | 5.1  | 7.9  | 50   | 4.3  | 0    |
| RPE1          | 11.1          | 100  | 25.4 | 10.5 | 25   | 8.7  | 16.7 |
| RPE2          | 16.7          | 13   | 100  | 10.5 | 25   | 8.7  | 16.7 |
| RPE3          | 8.3           | 1.7  | 3.4  | 100  | 50   | 4.3  | 0    |
| RPE4          | 5.6           | 0.4  | 0.8  | 5.3  | 100  | 4.3  | 0    |
| RPE5          | 2.8           | 0.9  | 1.7  | 2.6  | 25   | 100  | 33.3 |
| RPE6          | 0             | 0.4  | 0.8  | 0    | 0    | 8.7  | 100  |

**Supplementary Table 8. Common cis-eQTL in RPE1 and RPE2**

| Gene          | rsID        | EffectSize<br>eQTL (RPE1) | EffectSize<br>Interaction<br>(RPE1) | EffectSize<br>eQTL (RPE2) | EffectSize<br>Interaction<br>(RPE2) |
|---------------|-------------|---------------------------|-------------------------------------|---------------------------|-------------------------------------|
| RPS26         | rs10876864  | 1.38                      | 0.31                                | 1.30                      | 0.16                                |
| RP11-298J20.3 | rs10901835  | 1.28                      | -0.03                               | 1.03                      | -0.06                               |
| CCZ1B         | rs10265409  | -1.18                     | 0.04                                | -1.11                     | -0.30                               |
| ZP3           | rs11767431  | 1.19                      | 0.33                                | 1.11                      | 0.38                                |
| RP13-539J13.1 | rs72760972  | 1.17                      | 0.05                                | 0.93                      | 0.05                                |
| GSTT1         | rs5760147   | -1.18                     | -0.37                               | -1.17                     | -0.20                               |
| DNAJC15       | rs17553284  | -1.16                     | 0.26                                | -1.11                     | 0.15                                |
| RP11-166B2.1  | rs393329    | 1.13                      | -0.04                               | 1.09                      | -0.38                               |
| CCZ1          | rs13241510  | 1.06                      | 0.15                                | 1.07                      | 0.10                                |
| TRAPPC4       | rs11006     | 1.02                      | 0.11                                | 1.01                      | 0.20                                |
| FAM118A       | rs5764726   | 1.09                      | 0.50                                | 1.10                      | 0.33                                |
| KANSL1-AS1    | rs9898399   | 0.96                      | -0.30                               | 0.87                      | -0.42                               |
| PILRB         | rs11772580  | 0.98                      | 0.42                                | 0.82                      | -0.22                               |
| CCBL2         | rs10801690  | 0.94                      | -0.45                               | 0.75                      | -0.13                               |
| ATE1-AS1      | rs11200264  | -1.06                     | 0.23                                | -1.05                     | 0.07                                |
| EFHB          | rs1133328   | 1.01                      | 0.43                                | 0.93                      | 0.46                                |
| POMZP3        | rs11767431  | 0.94                      | -0.04                               | 0.98                      | -0.30                               |
| GPRC5C        | rs526657    | -0.87                     | 0.10                                | -0.77                     | -0.36                               |
| SLC25A1       | rs807666    | 0.89                      | 0.40                                | 0.94                      | 0.35                                |
| NBPF3         | rs4079441   | 1.01                      | 0.39                                | 0.87                      | 0.32                                |
| MGST3         | rs10918223  | 0.88                      | -0.08                               | 0.78                      | 0.01                                |
| TIMM10        | rs1846567   | 0.87                      | -0.17                               | 1.04                      | -0.45                               |
| MGMT          | rs1008982   | -0.86                     | 0.04                                | -0.87                     | -0.23                               |
| AC016757.3    | rs113905150 | 0.86                      | -0.27                               | 0.77                      | -0.24                               |
| ERAP2         | rs2927608   | 0.86                      | 0.19                                | 1.14                      | 0.29                                |
| NME1          | rs3785912   | -0.77                     | -0.43                               | -0.74                     | -0.25                               |
| CHURC1        | rs4902352   | 0.82                      | -0.06                               | 0.87                      | 0.49                                |
| FAM57A        | rs12941905  | -0.74                     | 0.30                                | -0.76                     | 0.02                                |
| NQO2          | rs138616686 | -0.78                     | 0.35                                | -0.74                     | 0.11                                |
| HLA-F         | rs1736919   | 0.86                      | 0.49                                | 0.83                      | 0.24                                |
